# Supplementary material
Source: HighWire-hosted journal article supplement (https://www.cmaj.ca/highwire/filestream/57981/field_highwire_adjunct_files/3/in-singh-appendix_4.pdf)
Supplement: in-singh-appendix_4.pdf [file in-singh-appendix_4.pdf]

#### Appendix 4: Characteristics of air-medical transports stratified by presence of in-transit critical events (N = 19 228)

| Factor                                                         | No. of patients included in univariable analysis | Frequency of critical events during transport, % | Unadjusted OR (95% CI) | p value* |
|----------------------------------------------------------------|--------------------------------------------------|--------------------------------------------------|------------------------|----------|
| <b>Patient</b>                                                 |                                                  |                                                  |                        |          |
| Age (per 10-year increment)                                    | 19 228                                           | NA                                               | 1.1 (1.0–1.1)          | < 0.001  |
| Female sex (v. Male)                                           | 18 866                                           | 5.3                                              | 1.1 (1.0–1.2)          | < 0.001  |
| Diagnostic category (reference = other medical)                | 3 425                                            |                                                  |                        |          |
| Respiratory                                                    | 1 294                                            | 6.8                                              | 1.6 (1.2–2.1)          | 0.88     |
| Cardiovascular                                                 | 5 937                                            | 6.0                                              | 1.4 (1.2–1.7)          | 0.05     |
| Neurological                                                   | 2 496                                            | 4.7                                              | 1.1 (0.8–1.4)          | 0.22     |
| Trauma                                                         | 1 741                                            | 5.9                                              | 1.4 (1.1–1.7)          | 0.29     |
| Surgical                                                       | 1 806                                            | 4.6                                              | 1.1 (0.8–1.4)          | 0.40     |
| Obstetric                                                      | 1 302                                            | 2.5                                              | 0.6 (0.4–0.8)          | 0.06     |
| Hemodynamic instability at baseline                            | 19 228                                           | 23.2                                             | 6.5 (5.3–7.9)          | < 0.001  |
| Assisted ventilation before transport                          | 19 228                                           | 13.8                                             | 3.7 (3.2–4.3)          | < 0.001  |
| <b>Transport</b>                                               |                                                  |                                                  |                        |          |
| Duration (per 10-min increment)                                | 15 868                                           | NA                                               | 1.02 (1.01–1.03)       | < 0.001  |
| Time on ground with patient, min, median (IQR)                 | 18 028                                           | NA                                               | 1.06 (1.04–1.07)       | < 0.001  |
| Distance (per 10-km increment)                                 | 15 362                                           | NA                                               | 0.99 (0.99–1.00)       | 0.15     |
| Fixed-wing aircraft (v. helicopter)                            | 17 819                                           | NA                                               | 0.8 (0.7–1.0)          | < 0.001  |
| Advanced care paramedic crew (v. critical care paramedic crew) | 19 228                                           | NA                                               | 0.5 (0.5–0.6)          | < 0.001  |
| <b>Contextual</b>                                              |                                                  |                                                  |                        |          |
| Type of sending facility (reference = acute care hospital)     | 12 549                                           |                                                  |                        |          |
| Non-acute care facility                                        | 2 638                                            | 3.9                                              | 0.7 (0.6–0.9)          | 0.40     |
| On-scene call                                                  | 2 681                                            | 6.7                                              | 1.3 (1.1–1.6)          | < 0.001  |
| Rural sending site                                             | 15 363                                           | 3.6                                              | 0.8 (0.7–0.9)          | 0.0035   |
| Season (reference = winter)                                    | 4 476                                            |                                                  |                        |          |
| Spring                                                         | 4 383                                            | 5.6                                              | 1.1 (0.9–1.3)          | 0.12     |
| Summer                                                         | 5 364                                            | 5.2                                              | 1.0 (0.8–1.2)          | 0.82     |
| Autumn                                                         | 5 101                                            | 4.6                                              | 0.9 (0.7–1.1)          | 0.35     |

Note: CI = confidence interval, IQR = interquartile range, NA = not applicable, OR = odds ratio.

\*p value from Wald Chi-square test of listed parameter estimate from final multivariable model.
